# Supplementary material for: Seasonal variability in methane and nitrous oxide fluxes from tropical peatlands in the western Amazon basin
Source: Copernicus journal article supplement (doi:10.5194/bg-14-3669-2017), 2017-08-07

Supplement of Biogeosciences, 14, 3669–3683, 2017  
<https://doi.org/10.5194/bg-14-3669-2017-supplement>  
© Author(s) 2017. This work is distributed under  
the Creative Commons Attribution 3.0 License.

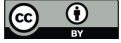

*Supplement of*

## **Seasonal variability in methane and nitrous oxide fluxes from tropical peatlands in the western Amazon basin**

**Yit Arn Teh et al.**

*Correspondence to:* Yit Arn Teh (yateh@abdn.ac.uk)

The copyright of individual parts of the supplement might differ from the CC BY 3.0 License.

## Figure Captions

**Figure S1.** Scatter plot of soil temperature against diffusive CH<sub>4</sub> flux. The data presented here are not transformed. Statistical analysis was performed on Box-Cox transformed data ( $P < 0.004481$ ,  $r^2 = 0.0356$ ,  $n = 986$ ).

**Figure S2.** Scatter plot of water table depth against diffusive CH<sub>4</sub> flux. The data presented here are not transformed. Statistical analysis was performed on Box-Cox transformed data ( $P < 0.000097$ ,  $r^2 = 0.75$ ,  $n = 987$ ).

**Figure S3.** Scatter plot of dissolved oxygen against diffusive N<sub>2</sub>O flux. The data presented here are not transformed. Statistical analysis was performed on Box-Cox transformed data ( $P > 0.9498$ ,  $r^2 = 0.000003638$ ,  $n = 1091$ ).

**Figure S4.** Scatter plot of electrical conductivity against diffusive N<sub>2</sub>O flux. The data presented here are not transformed. Statistical analysis was performed on Box-Cox transformed data ( $P < 0.0498$ ,  $r^2 = 0.003528$ ,  $n = 1087$ ).

Figure S1

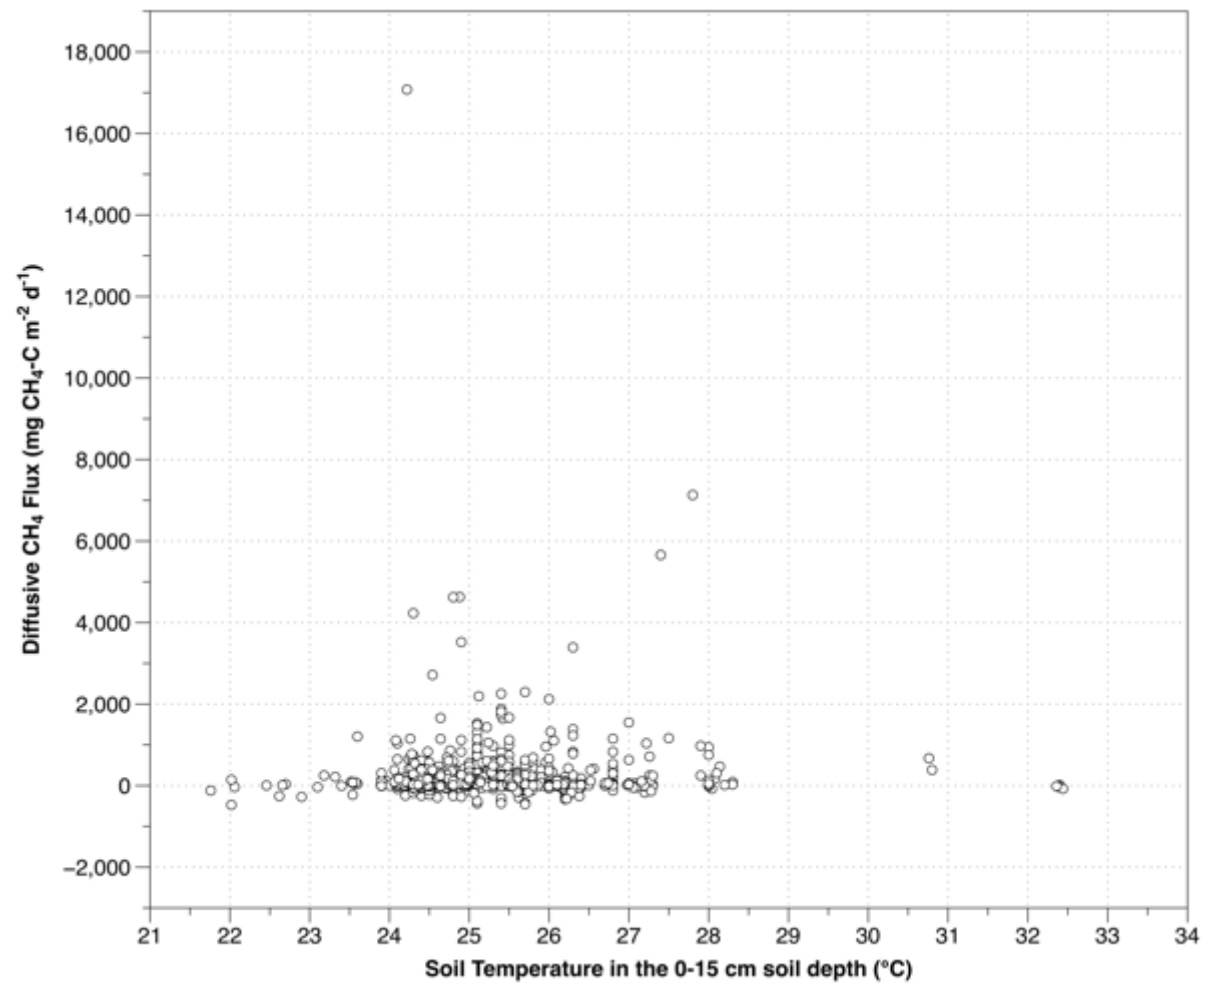

Figure S2

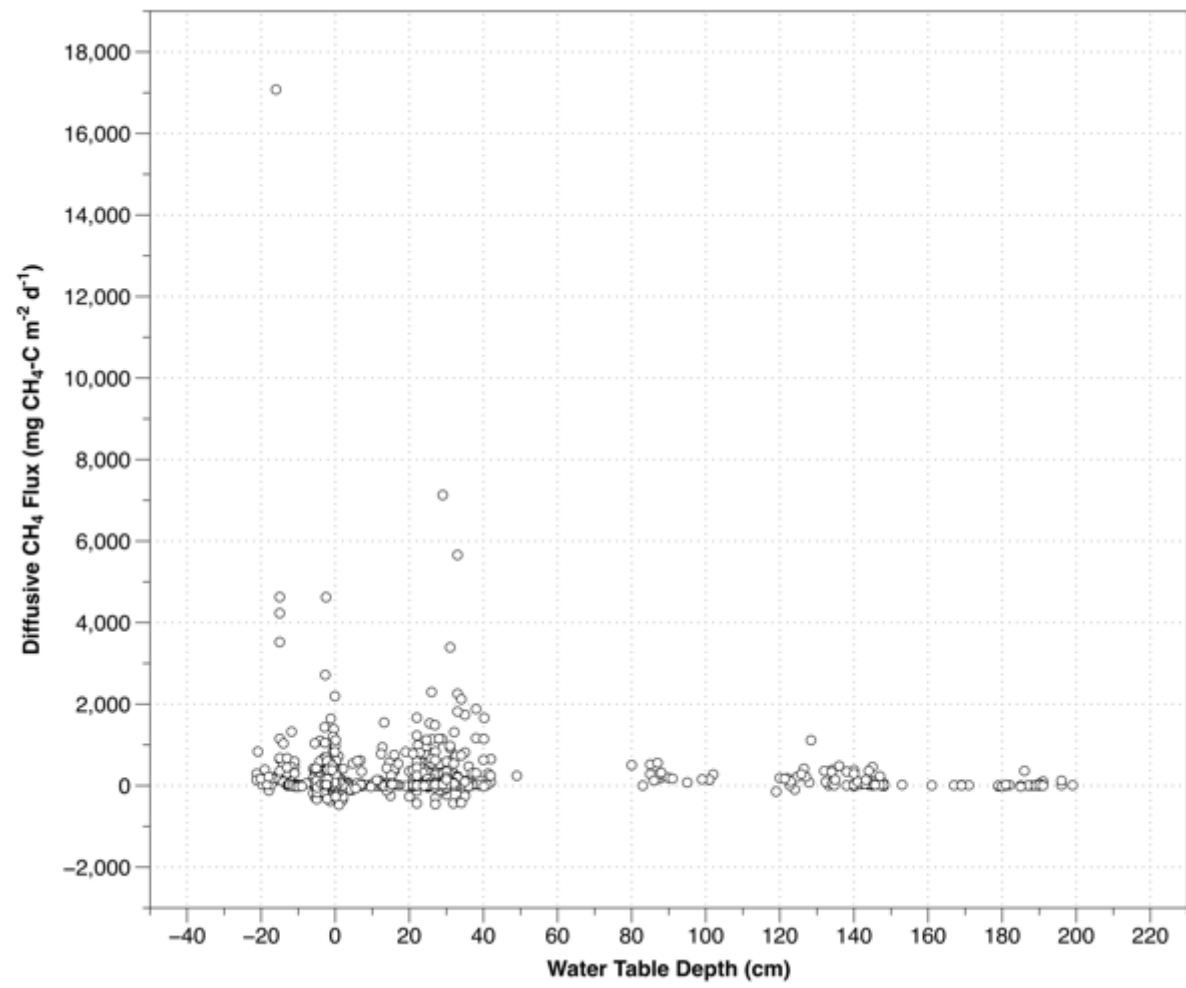

Figure S3

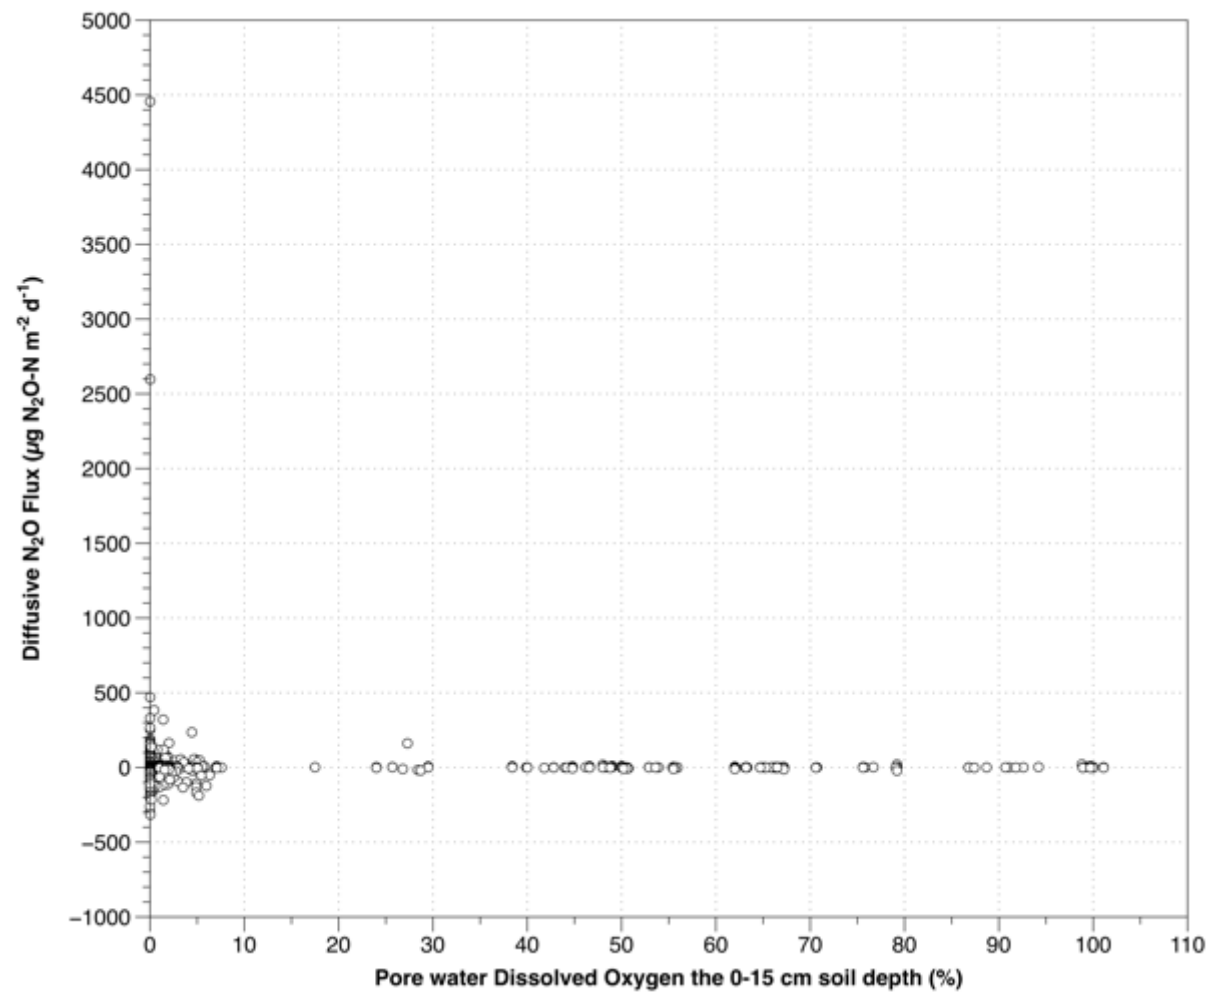

Figure S4

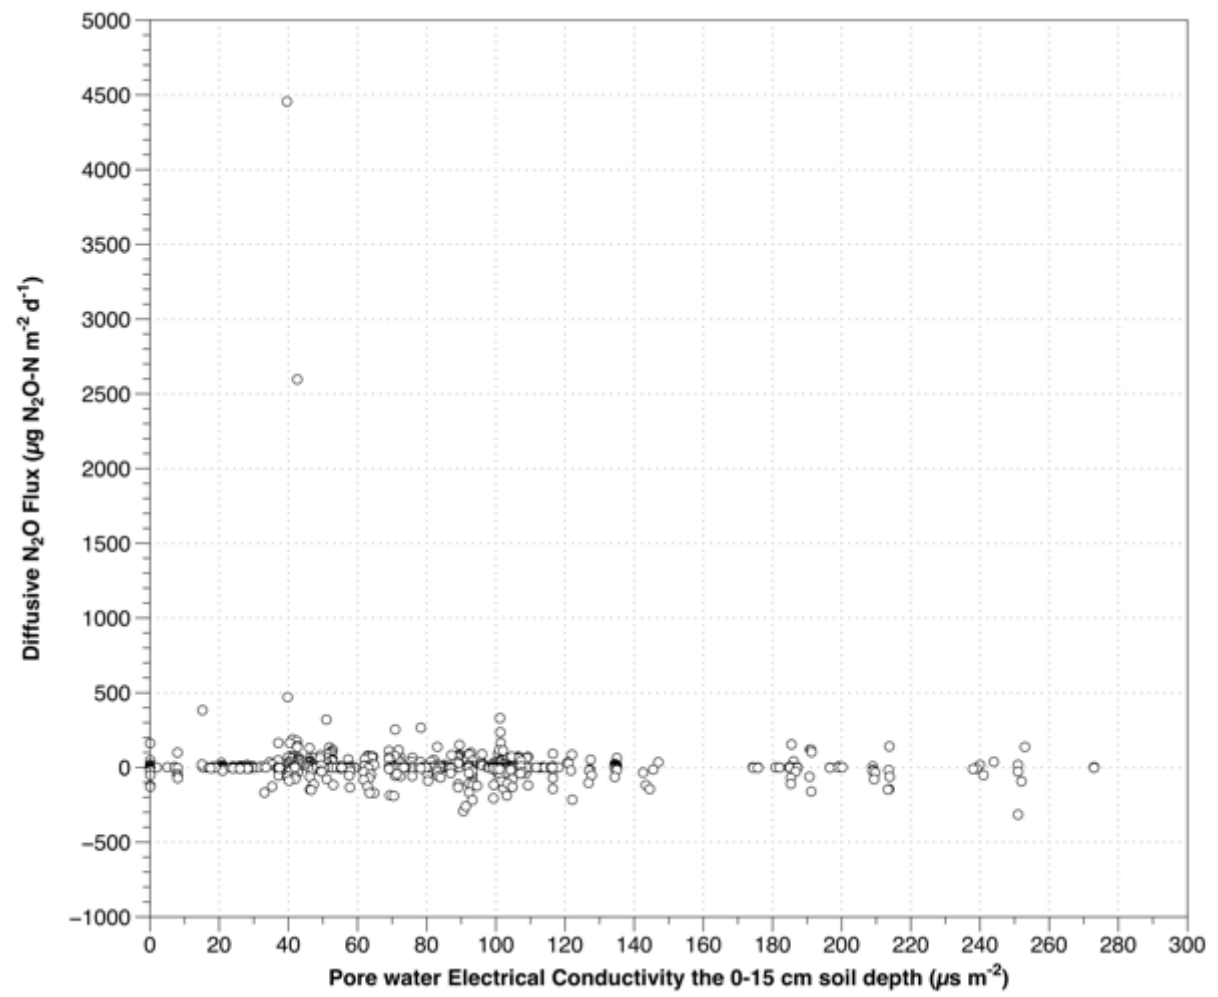

Supplement: Supplementary file 1 [file bg-14-3669-2017-supplement.pdf]
